# Supplementary material
Source: Springer Nature journal article supplement (https://www.springermedizin.de/resource/supplementary/12958_2012_997_MOESM6_ESM.pdf/9566582)

# Changes in GnRH peptides in the brain

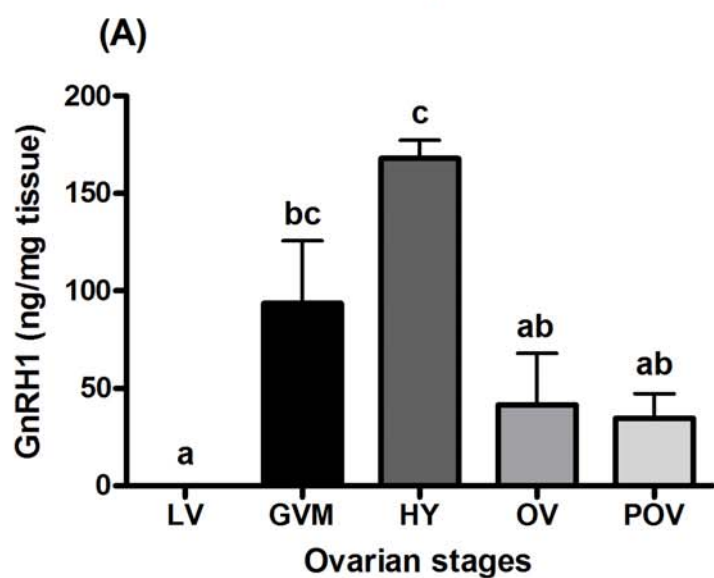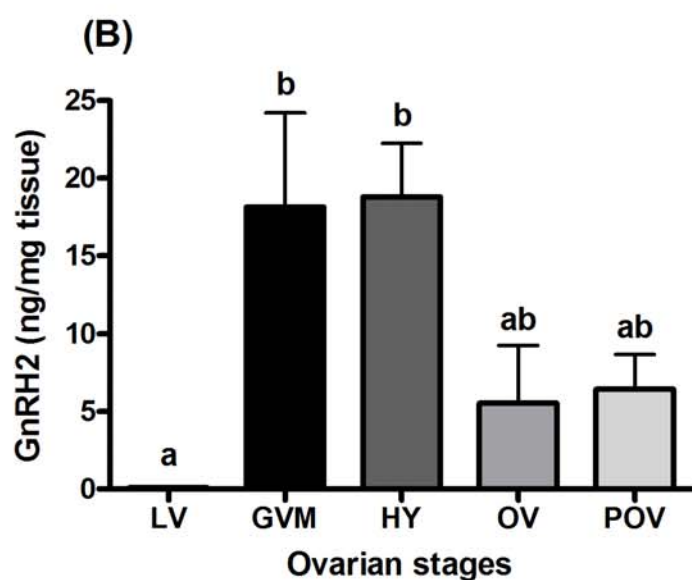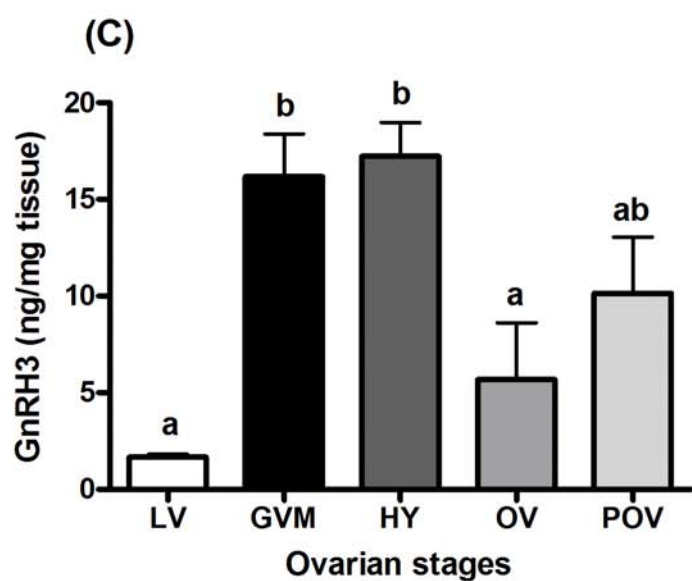

Supplement: MOESM6 [file 9566582]
